# Supplementary material for: The promoted catalytic hydrogenation performance of bimetallic Ni–Co–B noncrystalline alloy nanotubes
Source: Royal Society of Chemistry journal article supplement (doi:10.1039/c9ra05540a), 2019-01-01
Supplement: c9ra05540a1.pdf [file c9ra05540a1.pdf]

**Electronic Supplementary Information (ESI) for**

**Promoted catalytic hydrogenation performance of bimetallic Ni-Co-B noncrystalline alloy nanotubes**

**Min Mo<sup>a,b</sup>, Mingjiang Xie<sup>a</sup>, Xiaojuan Guo<sup>a</sup>, Weiping Ding<sup>a</sup> and Xuefeng Guo<sup>\*a</sup>**

<sup>a</sup>Key Lab of Mesoscopic Chemistry, School of Chemistry and Chemical Engineering, Nanjing University, Nanjing 210093, China.

<sup>b</sup>Department of Educational Science, Hunan First Normal University, Changsha 410205, China

**Corresponding Author:** guoxf@nju.edu.cn

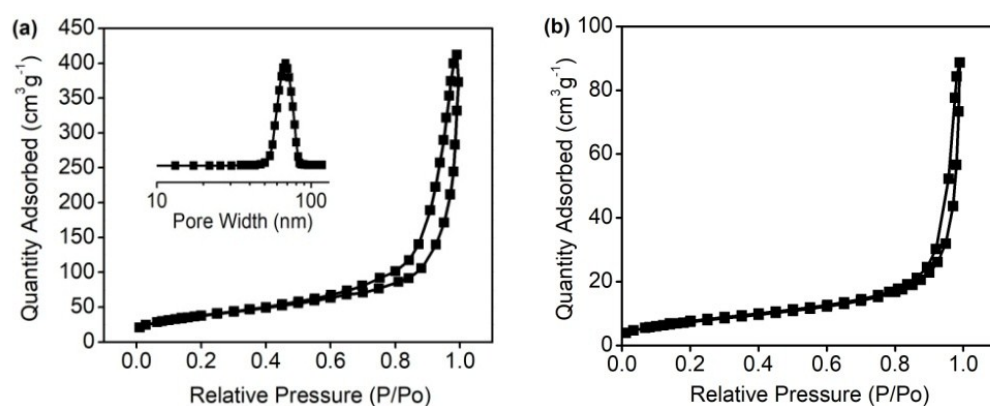

**Fig. S1** Nitrogen adsorption isotherms measured at 77 K: (a) Ni-Co-B NTs-1; (b) Ni-Co-B NPs.

The insets show the corresponding pore size distribution curve.
